# Supplementary material for: A colorimetric and near-infrared fluorescent probe with high sensitivity and selectivity for acid phosphatase and inhibitor screening
Source: Royal Society of Chemistry journal article supplement (doi:10.1039/c3cc49254k), 2014-06-09
Supplement: c3cc49254k1.pdf [file c3cc49254k1.pdf]

## Supplementary information for

# **A colorimetric and near infrared fluorescent probe with high sensitivity and selectivity for acid phosphatase and inhibitor screening**

Yongqian Xu,<sup>\*a</sup> Benhao Li,<sup>b</sup> Liangliang Xiao,<sup>a</sup> Shiguo Sun<sup>\*a</sup> and Yi Pang<sup>c</sup>

<sup>a</sup>College of Sciences, Northwest A&F University, Yangling, P. R. China, 712100, xuyq@nwsuaf.edu.cn

<sup>b</sup>School of Chemistry & Chemical Engineering, Shaanxi Normal University, Xi'an, P. R. China, 710062

<sup>c</sup>Department of Chemistry & Maurice Morton Institute of Polymer Science, The University of Akron, Akron, OH, 44325

## **Materials**

BSA, lysozyme, trypsin, Rnase A, pepsinum were purchased from Xiaan Wolsen Bio. Reagents Co. (Xiaan, China) and were used as received. Acid phosphatase (ACP) from potato was bought from Energy Chemical. **SQ** was synthesized and purified as reported previously.<sup>S1</sup>  $K_2MoO_4$  and  $(NaPO_3)_6$  was bought from Alfa Aesar.

## **Measurements**

Absorption and emission spectra were collected by using a Shimadzu 1750 UV-visible spectrometer and a RF-5301 fluorescence spectrometer (Japan), respectively.

## **Sample Preparation and Titration**

Stock solutions of acid phosphatase, BSA, lysozyme, trypsin, Rnase A, pepsinum ( $1.0 \times 10^{-2}$  M) were prepared in distilled water and diluted in phosphate buffer solution (pH=7.4) for titration experiments. Stock solutions of  $(NaPO_3)_6$  and  $K_2MoO_4$  ( $1.0 \times 10^{-4}$  M) were prepared in distilled water and diluted in phosphate buffer solution (pH=7.4) to  $5.0 \times 10^{-6}$  M for titration experiments. Stock solution of **SQ** ( $5.0 \times 10^{-4}$  M) was prepared in ethanol and diluted in phosphate buffer solution (pH=7.4) to  $5.0 \times 10^{-6}$  M for titration experiments. Acid phosphatase and other analytes were added to phosphate buffer solution of **SQ**, UV and fluorescence spectra were monitored after 3 h.

## **Calculation of concentrations of the hydrolyzed $(NaPO_3)_6$ and unhydrolyzed $(NaPO_3)_6$ as function of time<sup>[2]</sup>**

For accurate evaluation of the enzymes' kinetics, concentrations of unhydrolyzed substrate  $(NaPO_3)_6$  at different times were calculated by fluorescence intensity data based

on Eq. S1:

$$[S]_t = [S]_0 \left[ \left( \frac{I_0}{I_q} - 1 \right) / \left( \frac{I_0}{I_t} - 1 \right) \right] \quad \text{Eq. S1}$$

where  $[S]_t$  is the substrate  $(\text{NaPO}_3)_6$  concentration at time  $t$ ;  $[S]_0$  is the initial substrate  $(\text{NaPO}_3)_6$  concentration;  $I_0$  is the fluorescence intensity of the **SQ**;  $I_q$  is the fluorescence intensity quenched by the substrate  $(\text{NaPO}_3)_6$  before addition of the enzyme; and  $I_t$  is the fluorescence intensity at time  $t$ .

The hydrolyzed substrate  $(\text{NaPO}_3)_6$  concentrations at different time were derived from Eq. S2:

$$[\text{hydrolyzed } (\text{NaPO}_3)_6] = [S]_0 - [S]_t \quad \text{Eq. S2}$$

where  $[S]_0$  is the initial substrate  $(\text{NaPO}_3)_6$  concentration and  $[S]_t$  is the substrate concentration at different time.

### Calculation of kinetic parameters

Kinetic parameters with ACP were calculated from maintaining different  $(\text{NaPO}_3)_6$  concentration assays within the scope of 10  $\mu\text{M}$ . The Lineweaver-Burk plot was achieved using double reciprocal data of initial rate  $V$  vs substrate  $(\text{NaPO}_3)_6$  concentration  $[S]_0$  as in Eq. S3

$$\frac{1}{V} = \frac{K_m}{V_{\max} [S]_0} + \frac{1}{V_{\max}} \quad \text{Eq. S3}$$

where  $V$  is the initial rate and calculated from the range of the plots in Figure 2a;  $[S]_0$  is the initial substrate  $(\text{NaPO}_3)_6$  concentration;  $V_{\max}$  is the maximal rate;  $K_m$  is the Michaelis constant.

### Calculation of detecting limit

Detecting limit  $DL = K \times S_{b1} / S$ , where  $K=3$ ,  $S_{b1}$  is the standard derivation of the blank solution and  $S$  is the slope of the calibration curve.<sup>S3</sup>

### Preparation of human blood samples

The procedure for preparation of human blood samples is followed the reported literature.<sup>S4</sup> Human blood samples were collected from healthy volunteers treated in the local Medical Hospital. All samples were obtained by venipuncture and collected in heparinized vacutainer tubes. Then, a 200  $\mu\text{L}$  aliquot of the blood was deproteinized by mixing immediately with 400  $\mu\text{L}$  of cold 10%  $\text{Cl}_3\text{CCOOH}$ . After vortex mixing, the mixture was centrifuged at 8000 rpm for 10 min. A total of 400  $\mu\text{L}$  of the supernatant was

collected. The obtained supernatant was ready for assays.

- S1. a) P. F. Santos, L. V. Reis, I. Duarte, J. P. Serrano, P. Almeida, A. S. Oliveira and L. F. V. Ferreira, *Helv. Chim. Acta*, 2005, **88**, 1135; b) Y. Xu, Z. Li, A. Malkovskiy, S. Sun and Y. Pang, *J. Phys. Chem. B*, 2010, **114**, 8574.
- S2. Y. H. Xie, Y. Tan, R. X. Liu, R. Zhao, C. Y. Tan and Y. Y. Jiang, *ACS Appl. Mater. Interfaces*, 2012, **4**, 3784.
- S3. A. Hakonen, *Anal. Chem.*, **2009**, *81*, 4555.
- S4. D. Tian, Z. Qian, Y. Xia and C. Zhu, *Langmuir*, 2012, **28**, 3945.

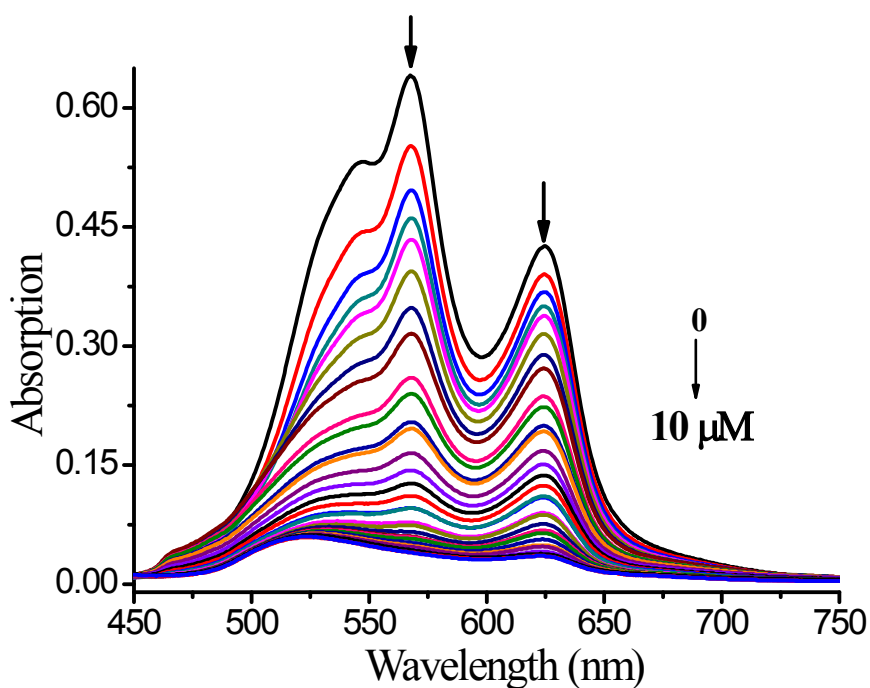

**Fig. S1** UV-Vis spectra change of SQ (5 μM) in phosphate buffer (5 mM, pH =7.4) upon addition of (NaPO<sub>3</sub>)<sub>6</sub> (0-10 μM).

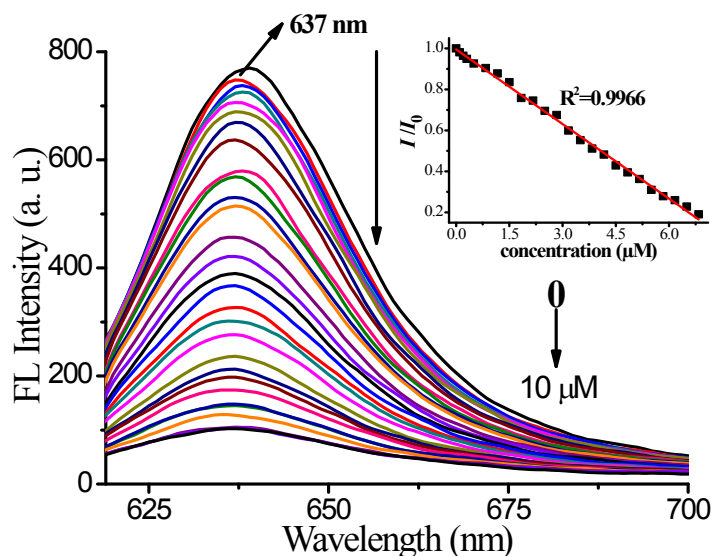

**Fig. S2** Fluorescence spectra change of **SQ** (5  $\mu\text{M}$ ) in phosphate buffer (5 mM, pH =7.4) upon addition of  $(\text{NaPO}_3)_6$  (0-10  $\mu\text{M}$ ). The arrow indicates the change of the fluorescence intensity with the  $(\text{NaPO}_3)_6$  concentrations ( $\lambda_{\text{ex}}$ =600 nm). Inset: plot of the relative fluorescence intensity ( $I/I_0$ ) of solution to  $(\text{NaPO}_3)_6$  concentrations, where  $I$  and  $I_0$  stand for the fluorescence intensity at 637 nm in the absence and presence of  $(\text{NaPO}_3)_6$ .

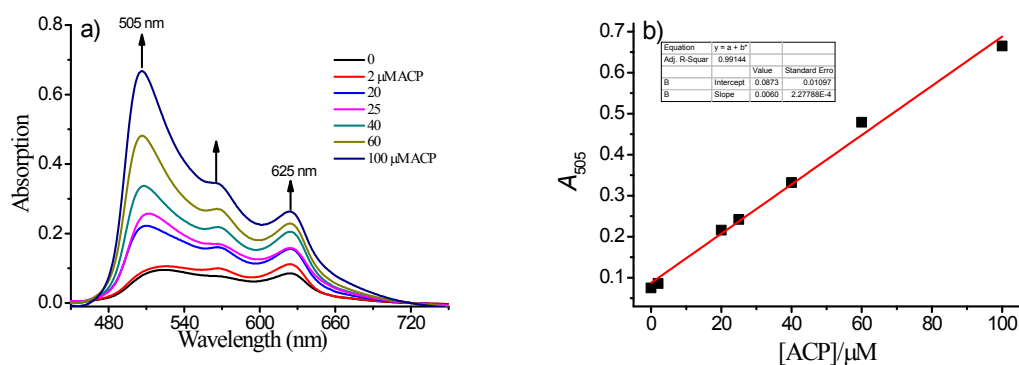

**Fig. S3** UV-Vis spectra change (a) and intensity change ( $A_{505}$ ) (b) of **SQ** (5  $\mu\text{M}$ ) in phosphate buffer (5 mM, pH =7.4) in the presence of  $(\text{NaPO}_3)_6$  (10  $\mu\text{M}$ ) upon addition of ACP.

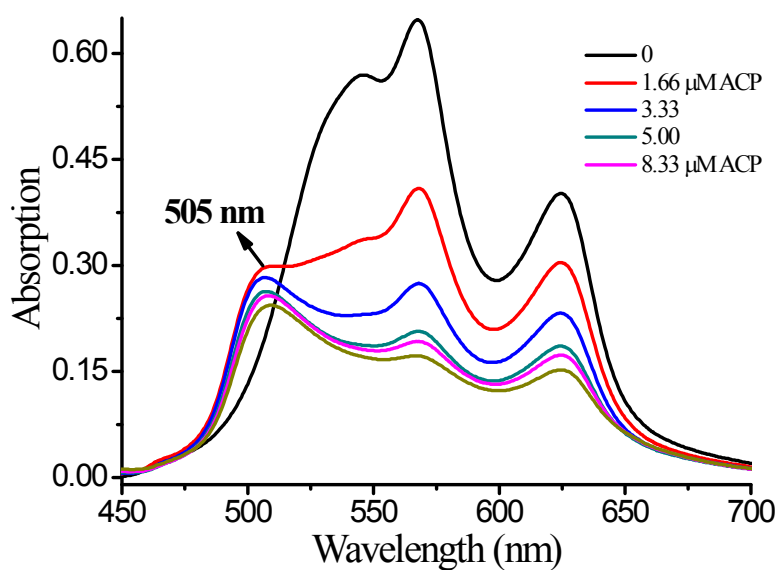

**Fig. S4** UV-Vis spectra change of **SQ** (5  $\mu\text{M}$ ) in phosphate buffer (5 mM, pH=7.4) in the absence of  $(\text{NaPO}_3)_6$  upon addition of ACP (0-8.33  $\mu\text{M}$ ).

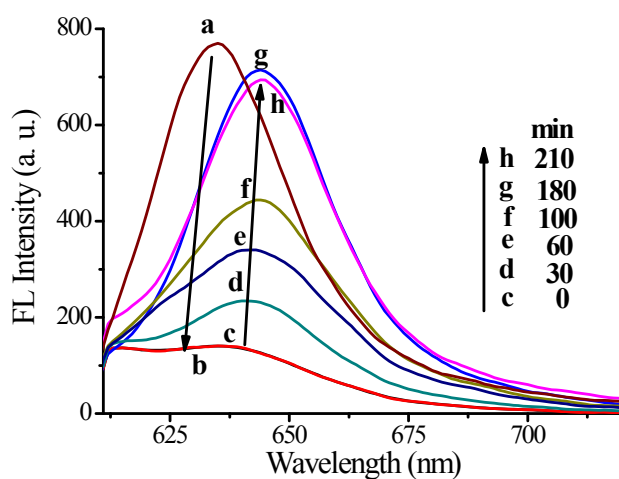

**Fig. S5** Fluorescence spectra change of **SQ** (5  $\mu\text{M}$ ) in the presence of  $(\text{NaPO}_3)_6$  (10  $\mu\text{M}$ ) and ACP (0.53  $\mu\text{M}$ ) in phosphate buffer (5 mM, pH=7.4), the excitation wavelength is 600 nm. Plot a, the spectrum of 5  $\mu\text{M}$  **SQ**, plot b, after titration of 10  $\mu\text{M}$   $(\text{NaPO}_3)_6$ ; plots c-h: spectra after addition of 0.53  $\mu\text{M}$  ACP and collected as a function of time (0, 30, 60, 100, 180, and 210 min, respectively).

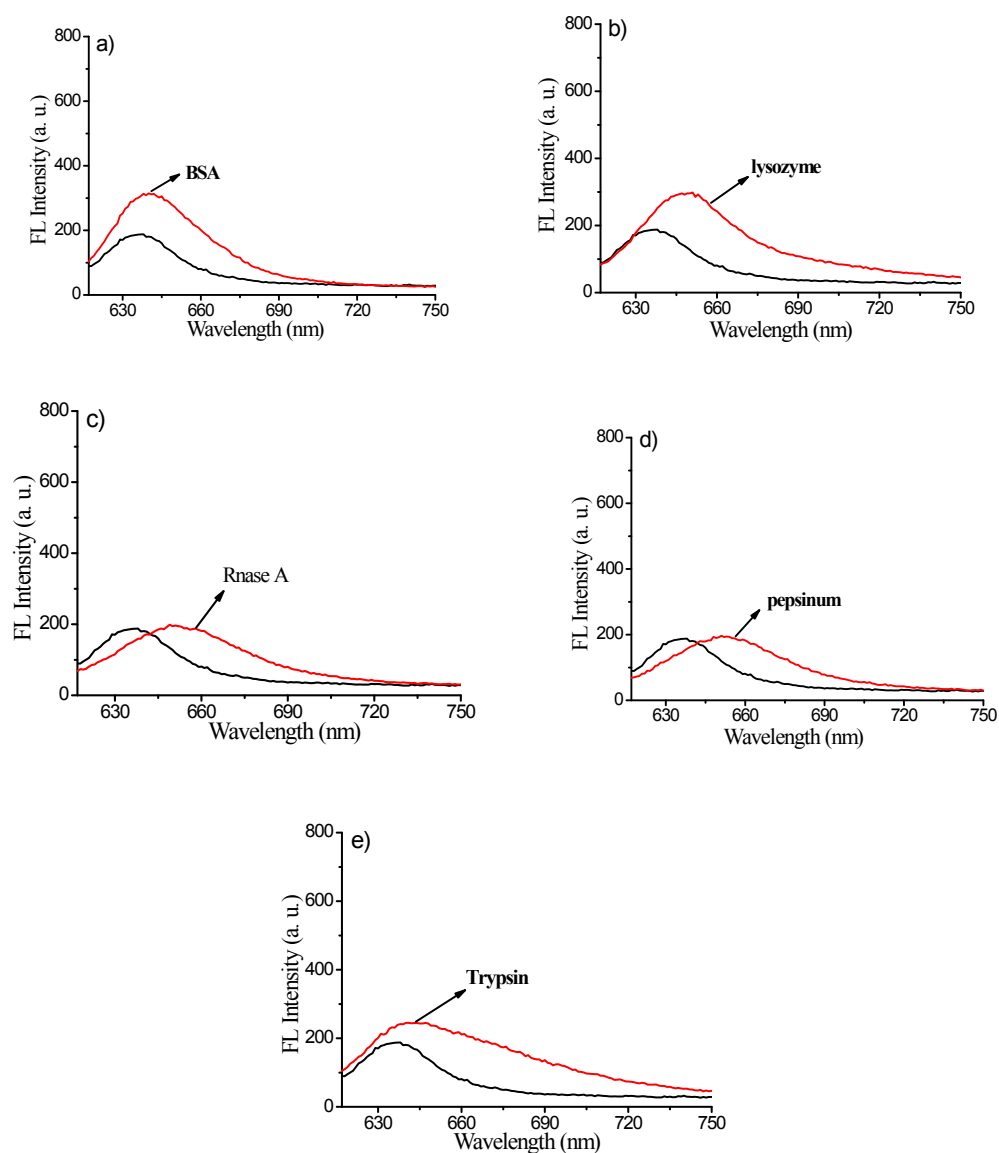

**Fig. S6** The fluorescence spectra change of SQ (5  $\mu\text{M}$ ) in phosphate buffer (5 mM, pH = 7.4) in the presence of  $(\text{NaPO}_3)_6$  (10  $\mu\text{M}$ ) upon addition of 0.53  $\mu\text{M}$  of BSA (a), lysozyme (b), Rnase A (c), pepsinum (d) and Trypsin (e), respectively.

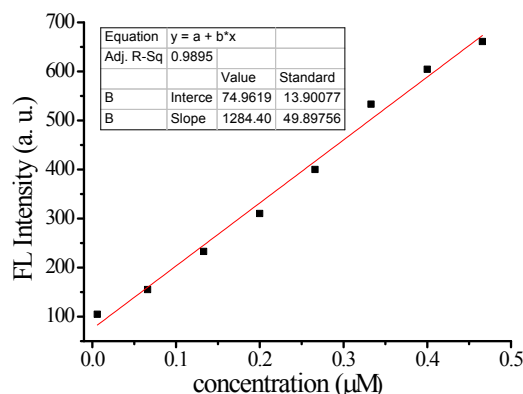

**Fig. S7** Fluorescence intensity change of **SQ** (5  $\mu\text{M}$ ) at 644 nm in phosphate buffer (5 mM, pH = 7.4) in the presence of  $(\text{NaPO}_3)_6$  (10  $\mu\text{M}$ ) upon addition of ACP ( $S_{b1} = 2.098$  and  $S = 1284.4$ ).

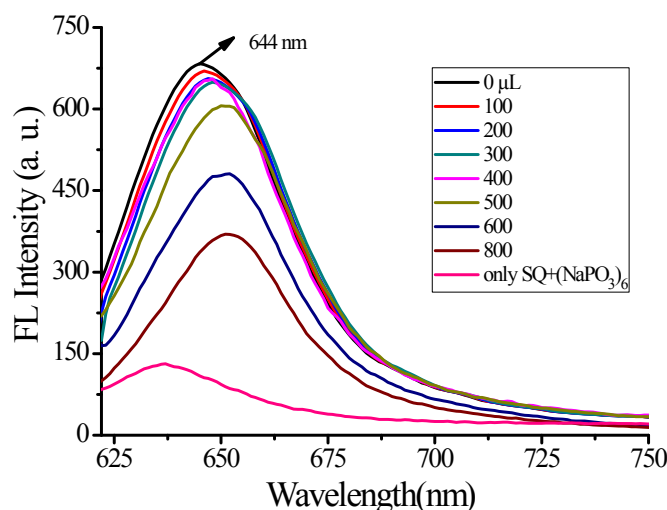

**Fig. S8** Fluorescence spectra change of **SQ** (5  $\mu\text{M}$ ) in 3 mL phosphate buffer (5 mM, pH = 7.4) with  $(\text{NaPO}_3)_6$  (10  $\mu\text{M}$ ) and ACP (0.53  $\mu\text{M}$ ) in the presence of different amounts of human serum samples.

In diluted human serum samples, **SQ**-( $\text{NaPO}_3$ )<sub>6</sub> shows turn-on fluorescence response to ACP. As human serum samples were diluted 7.5 times with phosphate buffer (5 mM, pH = 7.4), the fluorescence response to ACP is similar to that in pure phosphate buffer (5 mM, pH = 7.4). These results suggest that **SQ**-( $\text{NaPO}_3$ )<sub>6</sub> can be used for ACP detection in serum samples.

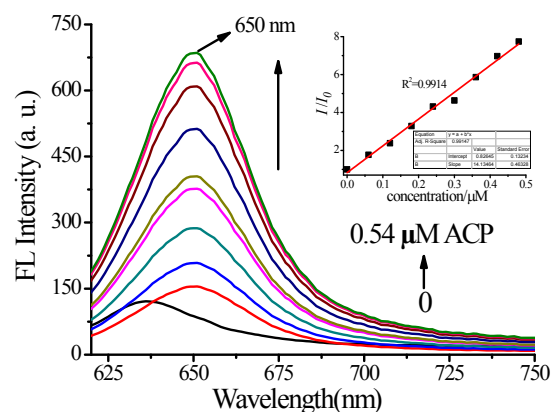

**Fig. S9** Fluorescence spectra change of SQ (5  $\mu\text{M}$ ) in 3 mL phosphate buffer (5 mM, pH =7.4) with  $(\text{NaPO}_3)_6$  (10  $\mu\text{M}$ ) and 400  $\mu\text{L}$  human serum samples upon addition of ACP (0-0.54  $\mu\text{M}$ ). Inset: The relative fluorescence intensity change at 650 nm with increasing concentration of ACP from 0 to 0.54  $\mu\text{M}$ .

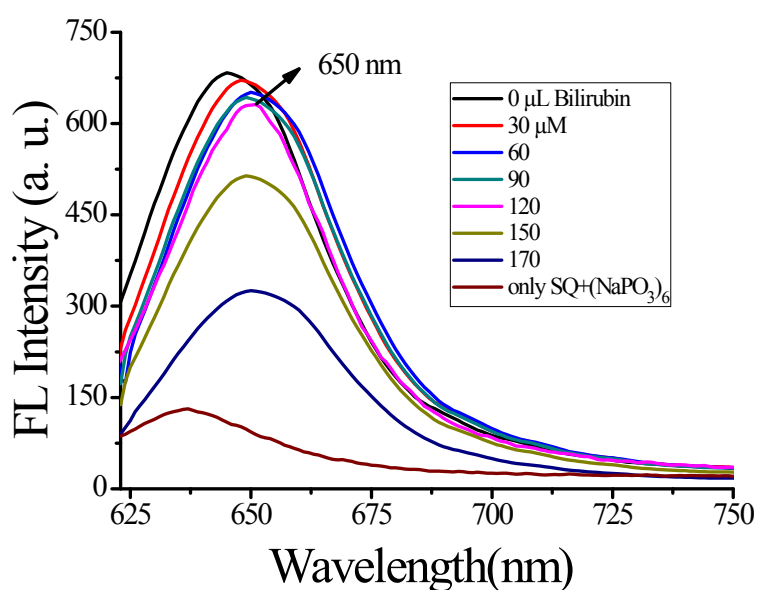

**Fig. S10** Fluorescence spectra change of SQ (5  $\mu\text{M}$ ) in 3 mL phosphate buffer (5 mM, pH =7.4) with  $(\text{NaPO}_3)_6$  (10  $\mu\text{M}$ ) and ACP (0.53  $\mu\text{M}$ ) in the presence of different concentration of bilirubin.



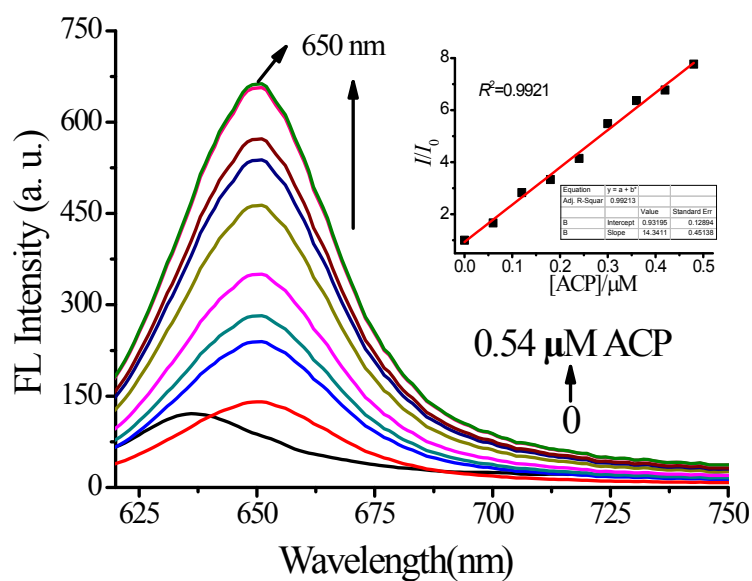

**Fig. S11** Fluorescence spectra change of SQ (5  $\mu$ M) in 3 mL phosphate buffer (5 mM, pH=7.4) with  $(\text{NaPO}_3)_6$  (10  $\mu$ M) and bilirubin (120  $\mu$ M) upon addition of ACP (0-0.54  $\mu$ M). Inset: The relative fluorescence intensity change at 650 nm with increasing concentration of ACP from 0 to 0.54  $\mu$ M.

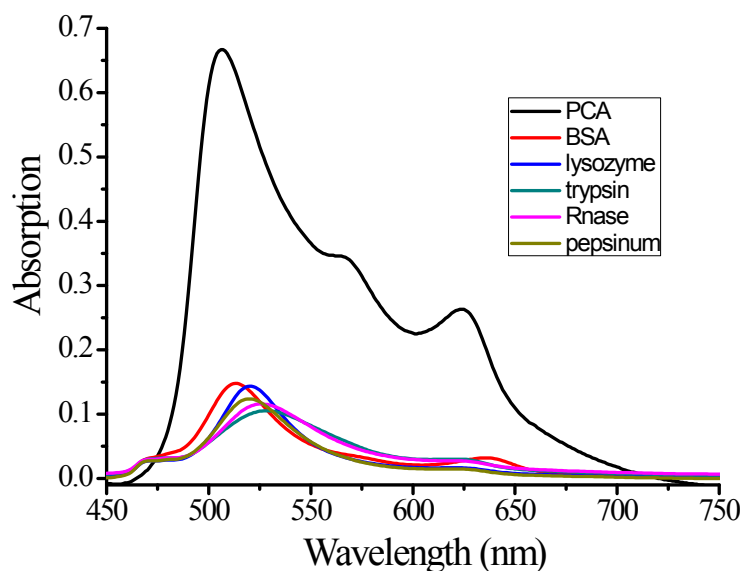

**Fig. S12** The UV-Vis spectra change of probe SQ (5  $\mu$ M) in phosphate buffer (5 mM, pH=7.4) with  $(\text{NaPO}_3)_6$  (10  $\mu$ M) in the presence of BSA, lysozyme, Rnase A, pepsinum and Trypsin (0.53  $\mu$ M), respectively.

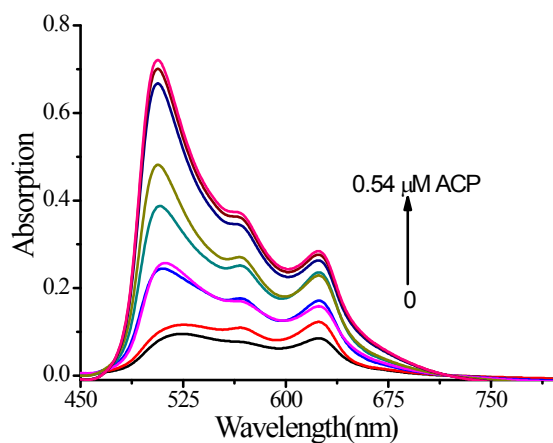

**Fig. S13** UV-Vis spectra change of **SQ** (5  $\mu\text{M}$ ) in 3 mL phosphate buffer (5 mM, pH =7.4) with  $(\text{NaPO}_3)_6$  (10  $\mu\text{M}$ ) and 400  $\mu\text{L}$  human serum samples upon addition of ACP (0-0.54  $\mu\text{M}$ ).

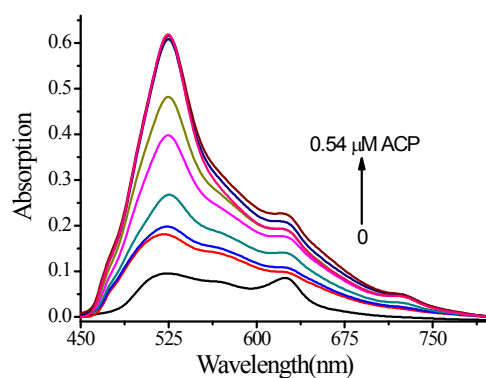

**Fig. S14** UV-Vis spectra change of **SQ** (5  $\mu\text{M}$ ) in 3 mL phosphate buffer (5 mM, pH =7.4) with  $(\text{NaPO}_3)_6$  (10  $\mu\text{M}$ ) and bilirubin (120  $\mu\text{M}$ ) upon addition of ACP (0-0.54  $\mu\text{M}$ ).
